# Supplementary material
Source: PubMed Central journal article supplement (PMC4960438)
Supplement: supp_sbw053_Suppl_Table_1_sMRi_analysis_AAL_Parcelation_table.pdf [file supp_sbw053_Suppl_Table_1_sMRi_analysis_AAL_Parcelation_table.pdf]

Supplementary Materials Table 1. Percentage difference change in GM between HC and SZ for the 95<sup>th</sup> percentile of reliable voxels. Reliability is defined as the mean value of the SVM weight divided by its standard error across all the generated models.

| <b>AAL Region</b>                             | <b>Hemisphere</b> | <b># of voxels</b> | <b>Mean</b> | <b>Std</b> |
|-----------------------------------------------|-------------------|--------------------|-------------|------------|
| Middle frontal gyrus                          | R                 | 293                | 6.72        | 8.25       |
| Precuneus                                     | L                 | 251                | -7.15       | 5.41       |
| Middle frontal gyrus                          | L                 | 247                | 5.96        | 8.43       |
| Inferior frontal gyrus, pars triangular gyrus | L                 | 225                | 8.27        | 6.76       |
| Precuneus                                     | R                 | 218                | -7.06       | 6.02       |
| Crus I of cerebellar hemisphere               | L                 | 196                | -5.91       | 4.45       |
| Insula                                        | L                 | 192                | 4.59        | 6.96       |
| Anterior cingulate gyrus                      | L                 | 191                | 5.45        | 6.31       |
| Middle temporal gyrus                         | L                 | 183                | 6.81        | 8.10       |
| Inferior frontal gyrus, pars triangular gyrus | R                 | 158                | 8.55        | 5.84       |
| Middle occipital gyrus                        | L                 | 156                | -9.90       | 11.10      |
| Lobule IV, V of cerebellar hemisphere         | L                 | 154                | -6.70       | 4.53       |
| Middle temporal gyrus                         | R                 | 153                | 0.15        | 11.48      |
| Lobule VI of cerebellar hemisphere            | R                 | 148                | -3.62       | 3.59       |
| Insula                                        | R                 | 147                | 6.17        | 7.54       |
| Inferior frontal gyrus, pars orbitalis        | R                 | 145                | 7.96        | 6.28       |
| Calcarine sulcus                              | R                 | 141                | -5.57       | 7.92       |
| Medial frontal gyrus                          | L                 | 139                | 6.40        | 4.28       |
| Crus I of cerebellar hemisphere               | L                 | 136                | -4.65       | 4.32       |
| Lobule VI of cerebellar hemisphere            | L                 | 135                | -4.55       | 3.96       |
| Postcentral gyrus                             | L                 | 117                | 0.97        | 10.42      |
| Precentral gyrus                              | L                 | 112                | -0.20       | 12.52      |
| Anterior cingulate gyrus                      | R                 | 111                | 6.56        | 4.49       |
| Fusiform gyrus                                | R                 | 110                | 4.20        | 9.03       |
| Cuneus                                        | R                 | 104                | -9.72       | 8.73       |
| Inferior frontal gyrus, pars orbitalis        | L                 | 102                | 6.10        | 5.96       |
| Midcingulate area                             | L                 | 102                | -2.46       | 7.86       |
| Fusiform gyrus                                | L                 | 102                | 1.86        | 7.35       |
| Lingual gyrus                                 | L                 | 101                | -7.02       | 10.74      |
| Parahippocampal gyrus                         | R                 | 99                 | 3.25        | 5.28       |
| Calcarine sulcus                              | L                 | 98                 | -7.80       | 5.39       |
| Medial frontal gyrus                          | R                 | 95                 | -3.09       | 11.28      |
| Inferior temporal gyrus                       | L                 | 94                 | 6.75        | 8.80       |
| Medial frontal gyrus                          | L                 | 92                 | 3.73        | 10.63      |
| Gyrus rectus                                  | L                 | 92                 | 6.97        | 7.38       |
| Crus I of cerebellar                          | R                 | 91                 | -5.03       | 3.36       |

| hemisphere                            |   |    |        |       |
|---------------------------------------|---|----|--------|-------|
| Postcentral gyrus                     | R | 87 | -7.34  | 10.20 |
| Superior temporal gyrus               | R | 87 | 6.53   | 8.40  |
| Inferior temporal gyrus               | R | 87 | 6.33   | 8.82  |
| Midcingulate area                     | R | 85 | -1.36  | 7.69  |
| Paracentral Lobule                    | L | 82 | -7.38  | 7.01  |
| Inferior parietal lobule              | L | 81 | -1.63  | 11.58 |
| Lingual gyrus                         | R | 77 | -6.58  | 6.33  |
| Putamen                               | R | 73 | 10.08  | 6.22  |
| Crus I of cerebellar hemisphere       | R | 73 | -4.83  | 2.91  |
| Gyrus rectus                          | R | 71 | 4.69   | 7.54  |
| Superior temporal pole                | L | 71 | 6.72   | 6.16  |
| Lobule IV, V of cerebellar hemisphere | R | 70 | -6.69  | 4.60  |
| Middle frontal gyrus, orbital part    | L | 69 | 6.06   | 4.42  |
| Hippocampus                           | R | 66 | 4.54   | 4.323 |
| Lobule IX of cerebellar hemisphere    | R | 66 | -12.12 | 6.56  |
| Cuneus                                | L | 64 | -5.74  | 6.40  |
| Thalamus                              | R | 64 | 6.99   | 6.74  |
| Superior temporal pole                | R | 64 | 6.83   | 6.46  |
| Lobule VIII of cerebellar hemisphere  | L | 64 | 9.84   | 6.19  |
| Medial orbitofrontal cortex           | L | 61 | 6.75   | 5.62  |
| Thalamus                              | L | 60 | 7.68   | 6.68  |
| Putamen                               | L | 59 | 10.27  | 6.60  |
| Lobule IV, V of vermis                |   | 57 | -6.98  | 4.16  |
| Superior parietal lobule              | R | 55 | -11.84 | 9.55  |
| Angular gyrus                         | R | 55 | -2.72  | 11.30 |
| Precentral gyrus                      | R | 54 | 1.59   | 11.40 |
| Angular gyrus                         | L | 53 | -5.26  | 8.31  |
| Paracentral Lobule                    | R | 53 | -5.93  | 6.64  |
| Medial frontal gyrus Orb              | R | 51 | 9.26   | 6.15  |
| Parahippocampal gyrus                 | L | 51 | 5.99   | 3.75  |
| Supplementary motor area              | L | 50 | -1.94  | 10.66 |
| Middle temporal pole                  | R | 48 | 6.87   | 5.60  |
| Hippocampus                           | L | 47 | 6.41   | 4.41  |
| Medial frontal gyrus Orb              | L | 45 | 8.01   | 5.23  |
| Medial frontal gyrus                  | R | 45 | 7.43   | 5.00  |
| Middle occipital gyrus                | R | 44 | -8.51  | 10.29 |
| Amygdala                              | R | 42 | 4.47   | 3.45  |
| Supplementary motor area              | R | 41 | -9.78  | 9.21  |
| Amygdala                              | L | 41 | 7.97   | 4.31  |
| Superior temporal gyrus               | L | 41 | 9.80   | 8.58  |
| Lobule IX of cerebellar hemisphere    | L | 40 | -9.02  | 5.88  |

|                                          |   |    |        |       |
|------------------------------------------|---|----|--------|-------|
| Middle frontal gyrus, orbital part       | R | 39 | 7.01   | 4.65  |
| Superior occipital                       | R | 38 | -10.28 | 10.88 |
| Inferior parietal lobule                 | R | 38 | -10.89 | 9.28  |
| Inferior frontal gyrus, pars opercularis | R | 37 | 10.19  | 7.93  |
| Supramarginal gyrus                      | L | 36 | 1.84   | 13.13 |
| Caudate nucleus                          | L | 36 | -4.44  | 6.42  |
| Caudate nucleus                          | R | 35 | -7.98  | 4.15  |
| Medial orbitofrontal cortex              | R | 33 | 7.52   | 4.32  |
| Supramarginal gyrus                      | R | 33 | 8.52   | 7.68  |
| Superior occipital                       | L | 31 | -15.18 | 12.20 |
| Inferior occipital cortex                | L | 31 | -2.18  | 14.35 |
| Middle temporal pole                     | L | 31 | 5.13   | 4.23  |
| Lobule IX of vermis                      |   | 28 | -8.65  | 4.32  |
| Inferior frontal gyrus, pars opercularis | L | 26 | 7.68   | 8.99  |
| Lobule VIII of cerebellar hemisphere     | R | 25 | 5.31   | 12.90 |
| Rolandic operculum                       | L | 22 | 13.31  | 6.11  |
| Inferior occipital cortex                | R | 21 | -9.23  | 5.56  |
| Rolandic operculum                       | R | 20 | 5.18   | 16.31 |
| Posterior cingulate gyrus                | L | 19 | -4.69  | 2.08  |
| Superior parietal lobule                 | L | 18 | -10.14 | 13.05 |
| Olfactory cortex                         | R | 16 | 1.83   | 7.55  |
| Lobule VIIIB of cerebellar hemisphere    | L | 16 | 3.62   | 10.70 |
| Olfactory cortex                         | L | 10 | 2.73   | 12.30 |
| Transverse temporal gyrus                | L | 6  | 11.15  | 8.05  |
| Lobule VIIIB of cerebellar hemisphere    | R | 6  | -7.87  | 5.15  |
| Transverse temporal gyrus                | R | 4  | 22.76  | 8.00  |
| Lobule III of vermis                     |   | 4  | -6.58  | 5.23  |
| Lobule X of vermis                       |   | 4  | -7.83  | 3.87  |
| Posterior cingulate gyrus                | R | 3  | -5.64  | 1.55  |
| Lobule VIII of vermis                    |   | 3  | -0.25  | 15.84 |
| Lobule III of cerebellar hemisphere      | R | 2  | -6.24  | 1.27  |
| Lobule VI of vermis                      |   | 2  | 0.93   | 6.27  |
| Lobule VII of vermis                     |   | 2  | 15.02  | 4.22  |
| Globus pallidus                          | R | 1  | 5.32   | 0     |
| Lobule III of cerebellar hemisphere      | L | 1  | -1.66  | 0     |
| Lobule X of cerebellar hemisphere        | R | 1  | 6.27   | 0     |
| Lobule I, II of vermis                   |   | 1  | -6.95  | 0     |
| Globus pallidus                          | L | 0  | 0      | 0     |
| Lobule X of cerebellar hemisphere        | L | 0  | 0      | 0     |
