# Supplementary material
Source: PubMed Central journal article supplement (PMC4960438)
Supplement: supp_sbw053_Suppl_Table_3_SVR_weight_analysis.pdf [file supp_sbw053_Suppl_Table_3_SVR_weight_analysis.pdf]

Supplementary Materials Table 3. Characterization of the clinical and demographic variables included in the SVR model.

| Clinical Variable                                         | SVR Weight Mean/Standard Error | Feature Selection Probability | Pearson Correlation with the label | Spearman Correlation with the label |
|-----------------------------------------------------------|--------------------------------|-------------------------------|------------------------------------|-------------------------------------|
| <i>PANSS Delusions</i>                                    | 0/0                            | 0.01                          | -0.06                              | -0.05                               |
| <i>PANSS Conceptual Disorganization</i>                   | 0/0.01                         | 0.01                          | -0.12                              | -0.07                               |
| <i>PANSS Hallucinatory Behavior</i>                       | 0/0                            | 0                             | 0.04                               | 0.01                                |
| <i>PANSS Excitement</i>                                   | 0/0.01                         | 0.04                          | -0.11                              | -0.11                               |
| <i>PANSS Grandiosity</i>                                  | 0/0.03                         | 0.24                          | -0.03                              | -0.21                               |
| <i>PANSS Suspiciousness/Persecution</i>                   | 0/0.01                         | 0.01                          | -0.04                              | -0.06                               |
| <i>PANSS Hostility</i>                                    | 0/0.01                         | 0.01                          | 0.11                               | 0.06                                |
| <i>PANSS Blunted Affect</i>                               | 0/0.04                         | 0.32                          | 0.2                                | 0.22                                |
| <i>PANSS Emotional Withdrawal</i>                         | 0.26/0.13                      | 0.88                          | 0.32                               | 0.31                                |
| <i>PANSS Poor Rapport</i>                                 | 0/0.02                         | 0.1                           | 0.21                               | 0.17                                |
| <i>PANSS Passive/Apathetic Social Withdrawal</i>          | 0/0.02                         | 0.07                          | 0.15                               | 0.14                                |
| <i>PANSS Difficulty in Abstract Thinking</i>              | -0.06/0.07                     | 0.49                          | -0.24                              | -0.24                               |
| <i>PANSS Lack of Spontaneity and Flow of Conversation</i> | -0.01/0.07                     | 0.04                          | 0.06                               | 0.11                                |
| <i>PANSS Stereotyped Thinking</i>                         | 0.03/0.08                      | 0.11                          | -0.01                              | -0.16                               |
| <i>PANSS Somatic Concern</i>                              | 0/0.01                         | 0.02                          | -0.04                              | -0.09                               |
| <i>PANSS Anxiety</i>                                      | -0.01/0.04                     | 0.18                          | -0.13                              | -0.18                               |
| <i>PANSS Guilt Feelings</i>                               | 0/0.02                         | 0.01                          | 0.04                               | -0.04                               |
| <i>PANSS Tension</i>                                      | -0.01/0.04                     | 0.05                          | -0.04                              | -0.11                               |
| <i>PANSS Mannerisms and Posturing</i>                     | 0/0.01                         | 0.01                          | -0.06                              | -0.01                               |
| <i>PANSS Depression</i>                                   | 0/0.01                         | 0                             | 0.06                               | 0.02                                |
| <i>PANSS Motor Retardation</i>                            | 0/0.02                         | 0.02                          | 0.06                               | 0.07                                |
| <i>PANSS Uncooperativeness</i>                            | 0/0.03                         | 0.02                          | 0.05                               | 0.07                                |
| <i>PANSS Unusual Thought Content</i>                      | 0/0.02                         | 0.06                          | -0.07                              | -0.13                               |
| <i>PANSS Disorientation</i>                               | -0.02/0.05                     | 0.13                          | -0.18                              | -0.16                               |
| <i>PANSS Poor Attention</i>                               | 0/0.02                         | 0.04                          | 0.18                               | 0.11                                |
| <i>PANSS Lack of Judgment and Insight</i>                 | 0/0.02                         | 0.02                          | -0.1                               | -0.08                               |
| <i>PANSS Disturbance of Volition</i>                      | 0/0                            | 0.01                          | -0.04                              | -0.04                               |
| <i>PANSS Poor Impulse Control</i>                         | 0/0.01                         | 0.03                          | -0.11                              | -0.1                                |
| <i>PANSS Preoccupation</i>                                | 0/0.02                         | 0.01                          | -0.06                              | -0.06                               |
| <i>PANSS Active Social Avoidance</i>                      | 0/0.03                         | 0.06                          | 0.11                               | 0.11                                |
| <i>PANSS Positive Score</i>                               | 0/0.03                         | 0.06                          | -0.04                              | -0.12                               |
| <i>PANSS Negative Score</i>                               | -0.06/0.09                     | 0.44                          | 0.18                               | 0.23                                |
| <i>PANSS General Score</i>                                | 0/0.02                         | 0.04                          | -0.03                              | -0.09                               |
| <i>PANSS Total Score</i>                                  | 0/0.01                         | 0                             | 0.03                               | -0.01                               |
| <i>Current Age</i>                                        | -0.3/0.05                      | 1                             | -0.51                              | -0.46                               |
| <i>Age at first psychiatric illness</i>                   | -0.23/0.08                     | 1                             | -0.49                              | -0.41                               |
| <i>Age at first psychotic symptoms</i>                    | -0.13/0.1                      | 0.94                          | -0.48                              | -0.34                               |
| <i>Age at first psychiatric hospitalization</i>           | 0.04/0.09                      | 1                             | -0.4                               | -0.37                               |
| <i>Current medication dose OLZ equivalent</i>             | 0/0.01                         | 0                             | 0.05                               | 0.03                                |
| <i>Current medication dose CPZ equivalent</i>             | 0/0.01                         | 0.01                          | 0.1                                | 0.07                                |
